# Supplementary figures and images for: The effectiveness of individual interpersonal psychotherapy as a treatment for major depressive disorder in adult outpatients: a systematic review
Source: Springer Nature journal article supplement (doi:10.1186/1471-244x-13-22), 2013-01-11

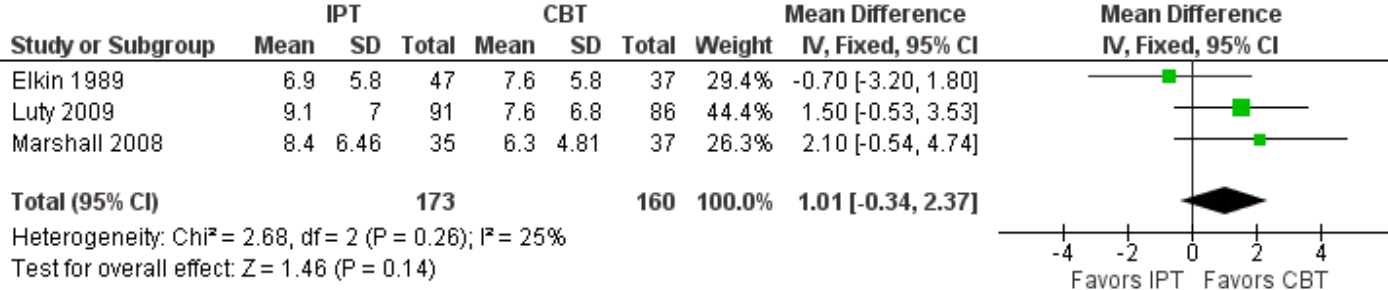

Supplement: 12888_2011_1185_MOESM6_ESM.pdf [file 12888_2011_1185_MOESM6_ESM.pdf]
